# Supplementary material for: Prediction of striped cylindrical micelles (SCMs) formed by dodecyl-β-d-maltoside (DDM) surfactants
Source: Royal Society of Chemistry journal article supplement (doi:10.1039/c8sm00274f), 2018-01-01
Supplement: c8sm00274f1.pdf [file c8sm00274f1.pdf]

## Supporting Information

### **Prediction of Striped Cylindrical Micelles (SCM) Formed by Dodecyl- $\beta$ -D-maltoside (DDM) Surfactants**

**Tarakanath Mandal and Ronald G. Larson\***

Department of Chemical Engineering, University of Michigan, Ann Arbor, MI-48109,  
USA

| <u>Bead-pairs</u>              | <u><math>\sigma</math> (nm)</u> | <u><math>\epsilon</math> (kJ/mol)</u> |
|--------------------------------|---------------------------------|---------------------------------------|
| C <sub>1</sub> -C <sub>1</sub> | 0.47                            | 3.5                                   |
| P <sub>1</sub> -P <sub>1</sub> | 0.47                            | 4.5                                   |
| P <sub>2</sub> -P <sub>2</sub> | 0.47                            | 4.5                                   |
| P <sub>4</sub> -P <sub>4</sub> | 0.47                            | 5.0                                   |
| N <sub>a</sub> -N <sub>a</sub> | 0.47                            | 4.0                                   |
| Q <sub>a</sub> -Q <sub>a</sub> | 0.47                            | 5.0                                   |
| C <sub>1</sub> -P <sub>1</sub> | 0.47                            | 2.7                                   |
| C <sub>1</sub> -P <sub>2</sub> | 0.47                            | 2.3                                   |
| C <sub>1</sub> -P <sub>4</sub> | 0.47                            | 2.0                                   |
| C <sub>1</sub> -N <sub>a</sub> | 0.47                            | 2.7                                   |
| C <sub>1</sub> -Q <sub>a</sub> | 0.62                            | 2.0                                   |
| P <sub>1</sub> -P <sub>2</sub> | 0.47                            | 4.5                                   |
| P <sub>1</sub> -P <sub>4</sub> | 0.47                            | 4.5                                   |
| P <sub>1</sub> -N <sub>a</sub> | 0.47                            | 4.5                                   |
| P <sub>1</sub> -Q <sub>a</sub> | 0.47                            | 5.0                                   |
| P <sub>2</sub> -P <sub>4</sub> | 0.47                            | 4.5                                   |
| P <sub>2</sub> -N <sub>a</sub> | 0.47                            | 4.5                                   |
| P <sub>2</sub> -Q <sub>a</sub> | 0.47                            | 5.0                                   |
| P <sub>4</sub> -N <sub>a</sub> | 0.47                            | 4.0                                   |
| P <sub>4</sub> -Q <sub>a</sub> | 0.47                            | 5.6                                   |
| N <sub>a</sub> -Q <sub>a</sub> | 0.47                            | 4.0                                   |

Table S1: Interaction parameters for various MARTINI bead pairs.

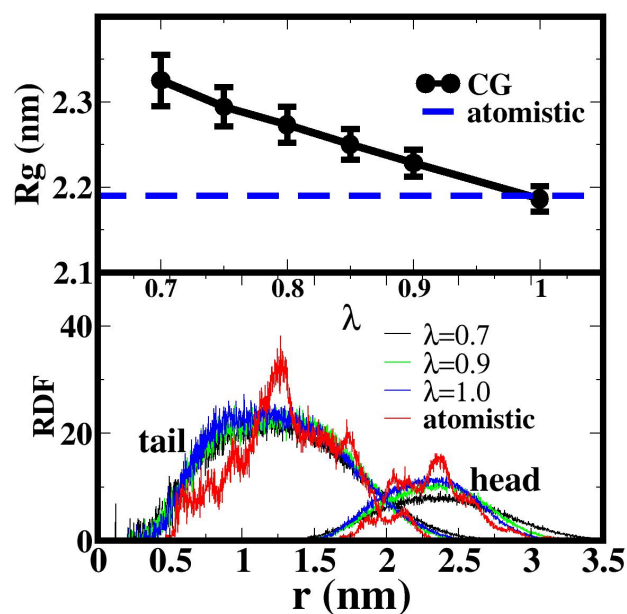

Figure S1: (a) *Upper panel*: Radius of gyration ( $R_g$ ) of DDM micelle as a function of  $\lambda$  obtained from CG simulation (see main text for details). Dotted line shows the  $R_g$  of the micelle obtained from atomistic simulation. *Lower panel*: Radial Distribution function (RDF) of the center of mass of the surfactant tails and heads with respect to the micelle center obtained for different CG and atomistic simulations.

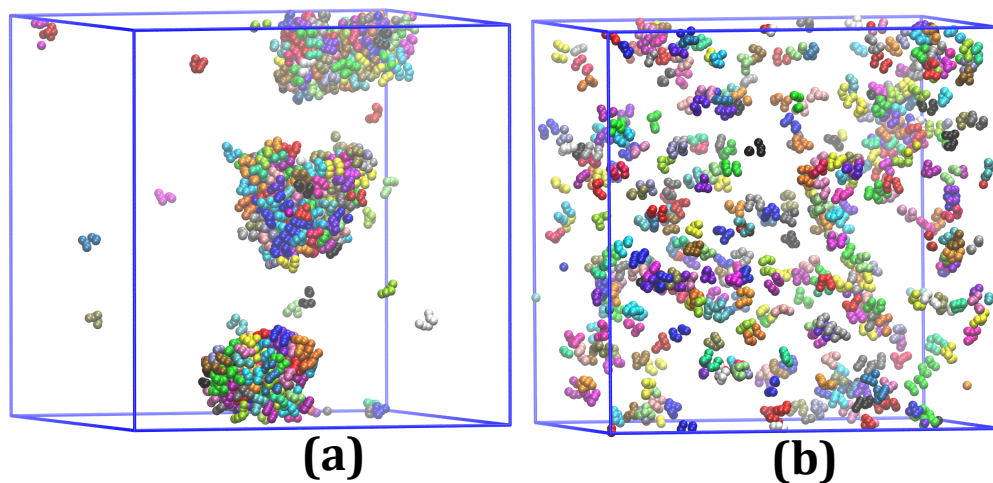

Figure S2: (a) Maltose molecules form unphysical clusters with original MARTINI force field ( $\lambda = 1.0$ ). Structure obtained after 300 ns long simulations (b) However, maltose molecules remain well dispersed in the solution with the force field for  $\lambda = 0.9$ . See main

text for details. The concentration of the maltose molecules in these systems is 100mM. Structure obtained after 1000 ns long simulations.

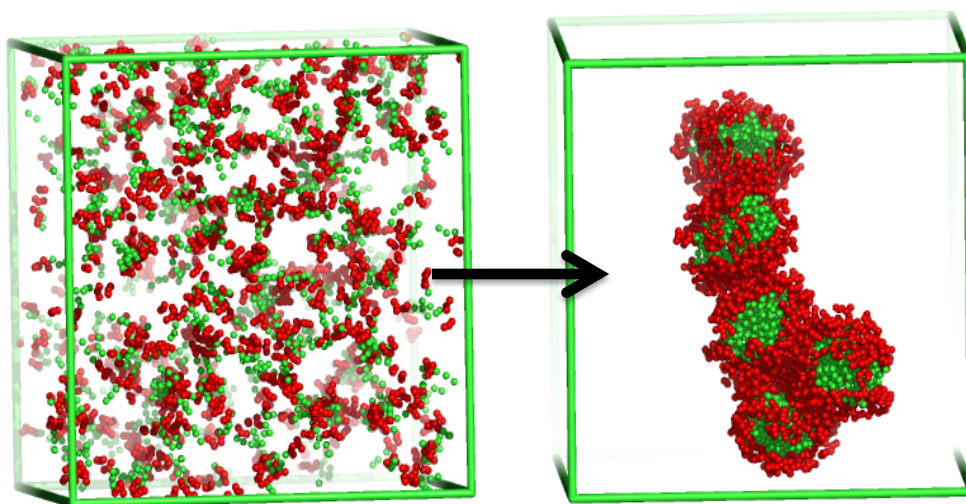

Figure S3: Formation of the SCM structure with the CG force field for  $\lambda = 0.9$ .

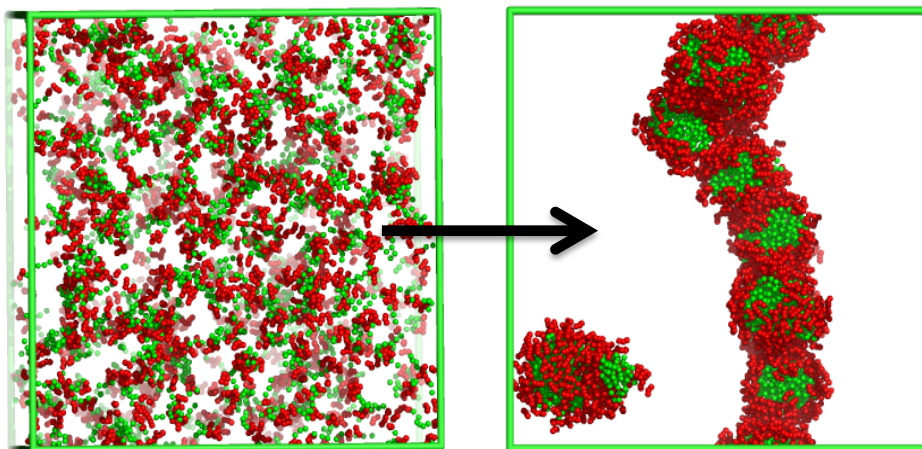

Figure S4: Formation of the SCM structure in a system containing 100mM DDM surfactants, with a total of 960 surfactants in the simulation box.

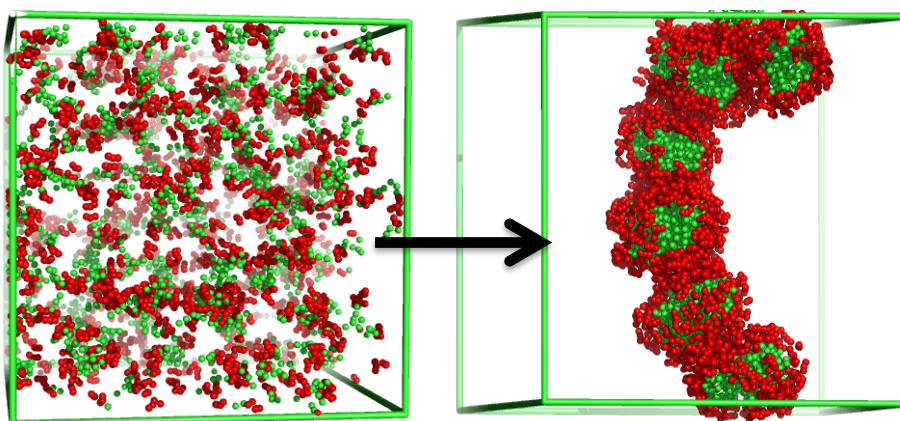

Figure S5: Formation of the SCM structure in a system containing 125mM DDM surfactants, with a total of 600 surfactants in the simulation box.
